# Supplementary material for: Selective fluorescence detection of acetylsalicylic acid, succinic acid and ascorbic acid based on a responsive lanthanide metal fluorescent coordination polymer
Source: Royal Society of Chemistry journal article supplement (doi:10.1039/d4ay00696h), 2024-01-01
Supplement: d4ay00696h1.pdf [file d4ay00696h1.pdf]

1 **Supplementary Materials**

2

3 **Selective fluorescence detection of acetylsalicylic acid,**  
4 **succinic acid and ascorbic acid based on the responsive**  
5 **lanthanide metal fluorescent coordination polymer**

6

7 Guo-Ying Chen <sup>a</sup>, Mao-Ling Luo <sup>a</sup>, Li Chen <sup>b</sup>, Jia-Li Wang <sup>a</sup>, Tong-Qing Chai <sup>a</sup>, Dan

8 Wang <sup>\*\*</sup> Feng-Qing Yang <sup>\*</sup>

9 <sup>a</sup>, School of Chemistry and Chemical Engineering, Chongqing University, Chongqing

10 401331, China

11 <sup>b</sup>, College of Optoelectronic Engineering, Key Laboratory of Optoelectronic

12 Technology and Systems, Ministry of Education, Key Disciplines Lab of Novel

13 Micro-Nano Devices and System Technology, Chongqing University, Chongqing

14 400044, China

15 <sup>\*</sup>Corresponding Authors: Prof. Dr. Feng-Qing Yang, School of Chemistry and

16 Chemical Engineering, Chongqing University, Chongqing 401331, China. Tel:

17 +8613617650637. E-mail: fengqingyang@cqu.edu.cn.

18 Prof. Dr. Dan Wang, School of Chemistry and Chemical Engineering, Chongqing

19 University, Chongqing 401331, China. Tel: +8618523118282. E-mail:

20 dwang@cqu.edu.cn.

21

## 22 **Materials and chemicals**

23 Praseodymium nitrate ( $\text{PrN}_3\text{O}_9 \cdot 6\text{H}_2\text{O}$ , 99%), cerium (III) nitrate hexahydrate  
24 ( $\text{CeN}_3\text{O}_9 \cdot 6\text{H}_2\text{O}$ , 99.99%), dysprosium nitrate hexahydrate ( $\text{DyH}_{12}\text{N}_3\text{O}_{15}$ , 99.9%),  
25 neodymium (III) nitrate hexahydrate ( $\text{NdN}_3\text{O}_9 \cdot 6\text{H}_2\text{O}$ , 99.0%), terbium nitrate  
26 pentahydrate ( $\text{Tb}(\text{NO}_3)_3 \cdot 5\text{H}_2\text{O}$ , 99.9%), lanthanum (III) nitrate hydrate ( $\text{La}$   
27  $(\text{NO}_3)_3 \cdot \text{XH}_2\text{O}$ , 99%), samarium (III) nitrate hexahydrate ( $\text{SmN}_3\text{O}_9 \cdot 6\text{H}_2\text{O}$ , 99.99%),  
28 gadolinium (III) nitrate hexahydrate ( $\text{GdN}_3\text{O}_9 \cdot 6\text{H}_2\text{O}$ , 99%), europium nitrate  
29 pentahydrate ( $\text{EuH}_{10}\text{N}_3\text{O}_{14}$ , 99.9%), ethylene glycol (EG, 98%), fructose (99%), 2-  
30 aminoimidazole (2-AI, 97%), 2-ethylimidazole (2-EIM, 99%), and esterase (Est, from  
31 porcine liver, 15 U/mg) were purchased from Macklin Biochemical Technology Co.,  
32 Ltd. (Shanghai, China). KCl, AA ( $\geq 99.0\%$ ), polyethylene glycol (PEG), and NaCl were  
33 purchased from Chengdu Chron Chemicals Co., Ltd. (Chengdu, China).  $\text{CaCl}_2$   
34 ( $\geq 96.0\%$ ),) was purchased from Tianjin Damao Chemical Reagent Factory (Tianjin,  
35 China). Urea (99%) and sodium benzoate (99%) were purchased from Chongqing  
36 Chuandong Chemical Group Co., Ltd. (Chongqing, China). Creatinine (99%), vitamin  
37 B3 (VB3, 98%), rabbit plasma (with sodium citrate as the anticoagulant), 2-MIm (98%),  
38 2-mercaptoimidazole (2-MI, 98%), and glucose (99%) were purchased from Shanghai  
39 YuanYe Biological Technology Co., Ltd. (Shanghai, China). The L-histidine (His,  
40 99%), L (+)-arginine (Arg, 99%), and L-lysine (Lys, 99%) were purchased from  
41 Chengdu Huaxia Chemical Reagent Co., Ltd. (Chengdu, China). The L-cysteine (Cys,  
42 99%) was purchased from Tianjin Guangfu Fine Chemical Co., Ltd. (Tianjin, China).  
43 Imidazole (IM, 99%) was purchased from Shanghai Aladdin Biochemical Technology  
44 Co., Ltd. (Shanghai, China). Xylose (99%) was purchased from Beijing Dingguo  
45 Biotechnology Co., Ltd (Beijing, China). Vitamin C tablet was purchased from  
46 Huazhong Pharmaceutical Co., Ltd. (Xiangyang, China). Aspirin Enteric-Coated

47 tablets were obtained from Bayer HealthCare Manufacturing Co., Ltd (Beijing, China).  
48 All the samples were deposited at the Pharmaceutical Engineering Laboratory at the  
49 School of Chemistry and Chemical Engineering, Chongqing University, Chongqing,  
50 China.

### 51 **Instrumentation**

52 Fluorescence analysis was carried out with an F-7100 fluorescence spectrophotometer  
53 (Hitachi, Tokyo, Japan). The tabletop low-speed centrifuge L420 was obtained from  
54 Hunan Xiang Yi Laboratory Instrument Development Co., Ltd. (Changsha, China). A  
55 water bath (HH-1S, Miqi Instrument Equipment Co., Ltd, Shanghai, China) was used  
56 in the temperature-controlling process. The field-emission scanning electron  
57 microscopy (SEM) (JSM-7600F, JEOL Ltd., Tokyo, Japan) was used to characterize  
58 the synthesized materials. The Fourier-transform infrared (FT-IR) spectra were  
59 recorded using a Nicolet iS50 (Thermo Scientific Inc., Massachusetts, USA). The  
60 sample's X-ray diffraction (XRD) patterns were acquired through an X' pert Powder  
61 diffractometer (Malvern Panalytical Ltd., Overijssel, Netherlands) with secondary  
62 beam graphite monochromated Cu K $\alpha$  radiation. The Images and element composition  
63 of materials were obtained through transmission electron microscopy (TEM) (Thermo  
64 Fisher Scientific, Prague, Czechia). The ultrapure water used throughout this study was  
65 purified by a water purification system (ATSelem 1820A, Antesheng Environmental  
66 Protection Equipment, Chongqing, China). The ultrasonic cleaner was purchased from  
67 Kunshan Jielimei Ultrasonic Instrument Co., Ltd. (Kunshan, China).

### 68 **Mass spectrometry analysis**

69 All mass spectrometry (MS) experiments were performed on a QE Plus 21006403 mass  
70 spectrometer (Thermo Scientific Inc., Massachusetts, USA) equipped with standard  
71 ESI source. The reaction mixtures of ZIF-8/Est + ASA + 2-MIm + Dy (III), ZIF-8/Est

72 + ASA + 2-MIm + Dy (III) + SA, and ZIF-8/Est + ASA + 2-MIm + Dy (III) + AA were  
73 analyzed by MS, respectively. 150  $\mu$ L of ZIF-8 (concentration B) or Est (9.38 U/mL)  
74 and 150  $\mu$ L ASA (0.50 or 0.75 mM) were mixed together in a 1.5 mL centrifuge tube  
75 and incubated at 40  $^{\circ}$ C for 3 min, then 300  $\mu$ L 2-MIm (6.25 or 5.00 mM), 300  $\mu$ L Dy  
76 (2.50 mM), and 300  $\mu$ L ultrapure water (or 1.25 mM of SA, 0.75 mM of AA) were  
77 added to the above solution and incubated at 40  $^{\circ}$ C for another 3 min. Then, the solution  
78 after reaction was centrifugation for 1 min. Pass the supernatant through a 0.22  $\mu$ m  
79 membrane and take 0.5 mL of supernatant for MS analysis (scan range: 50–1000  $m/z$ ).  
80 All analyses were conducted in a positive ion mode.

81

82 **Supplementary Figures**

83

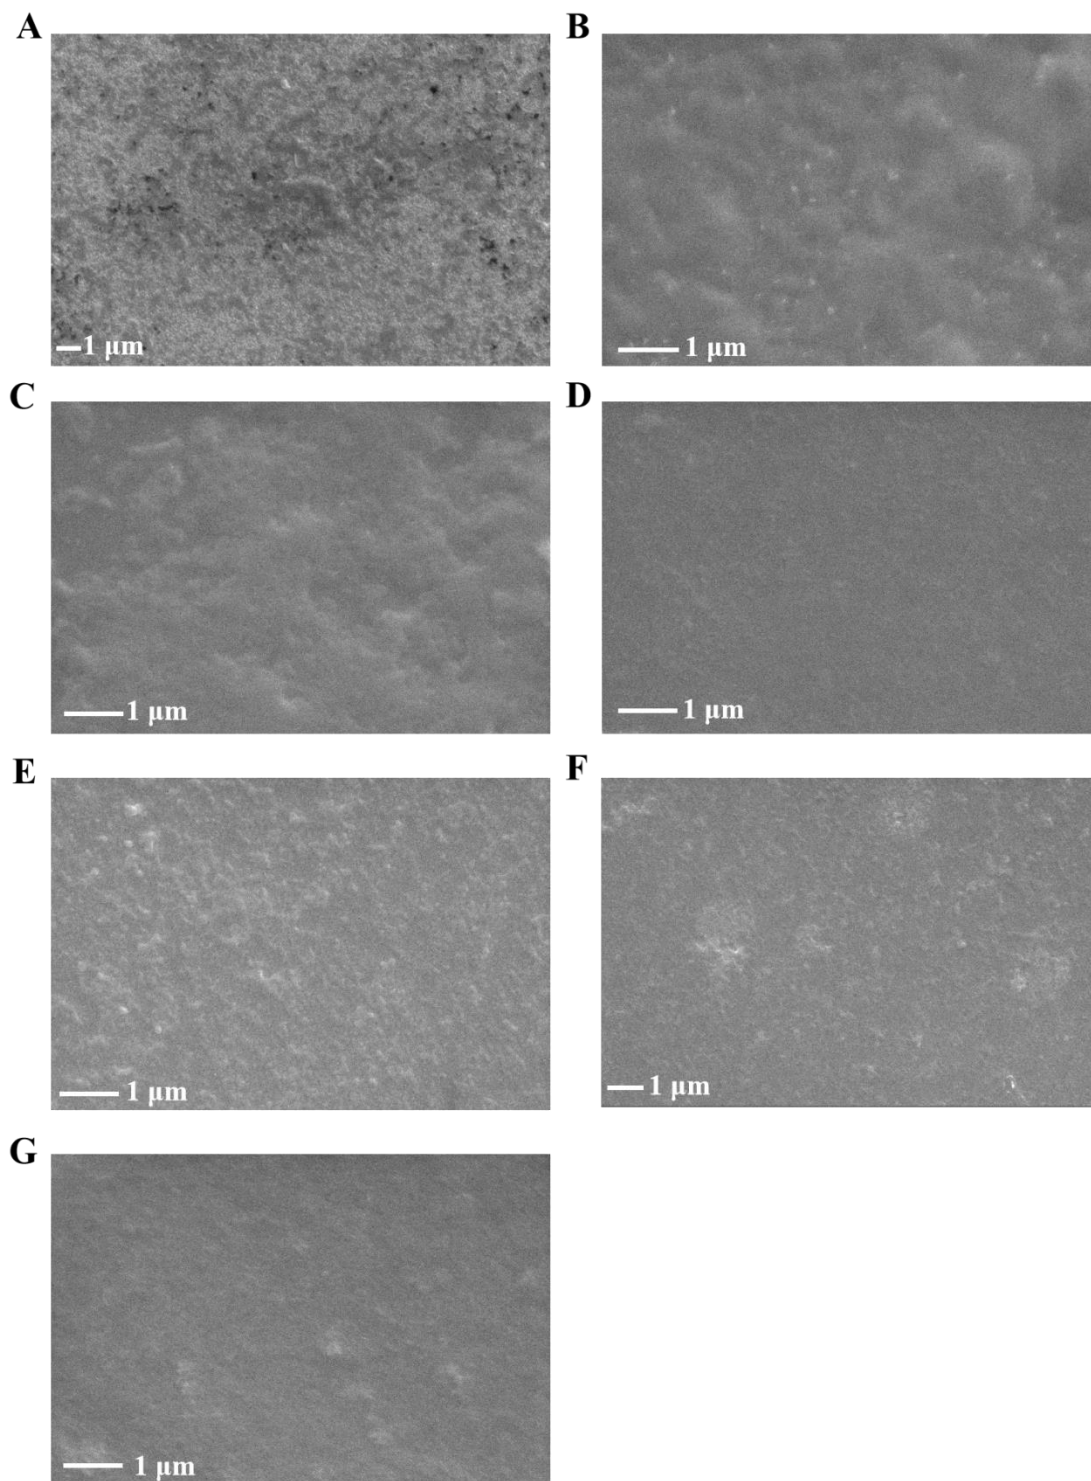

84

85 **Figure S1** SEM images of the reacted solution (Est, ASA, 2-MIm, and Dy (III) (A), adding  
86 different SA concentrations of 0.16 mM (B), 1.25 mM (C), and 2.5 mM (D), adding different  
87 AA concentrations of 0.0078 mM (E), 0.13 mM (F), and 0.25 mM (G).

88

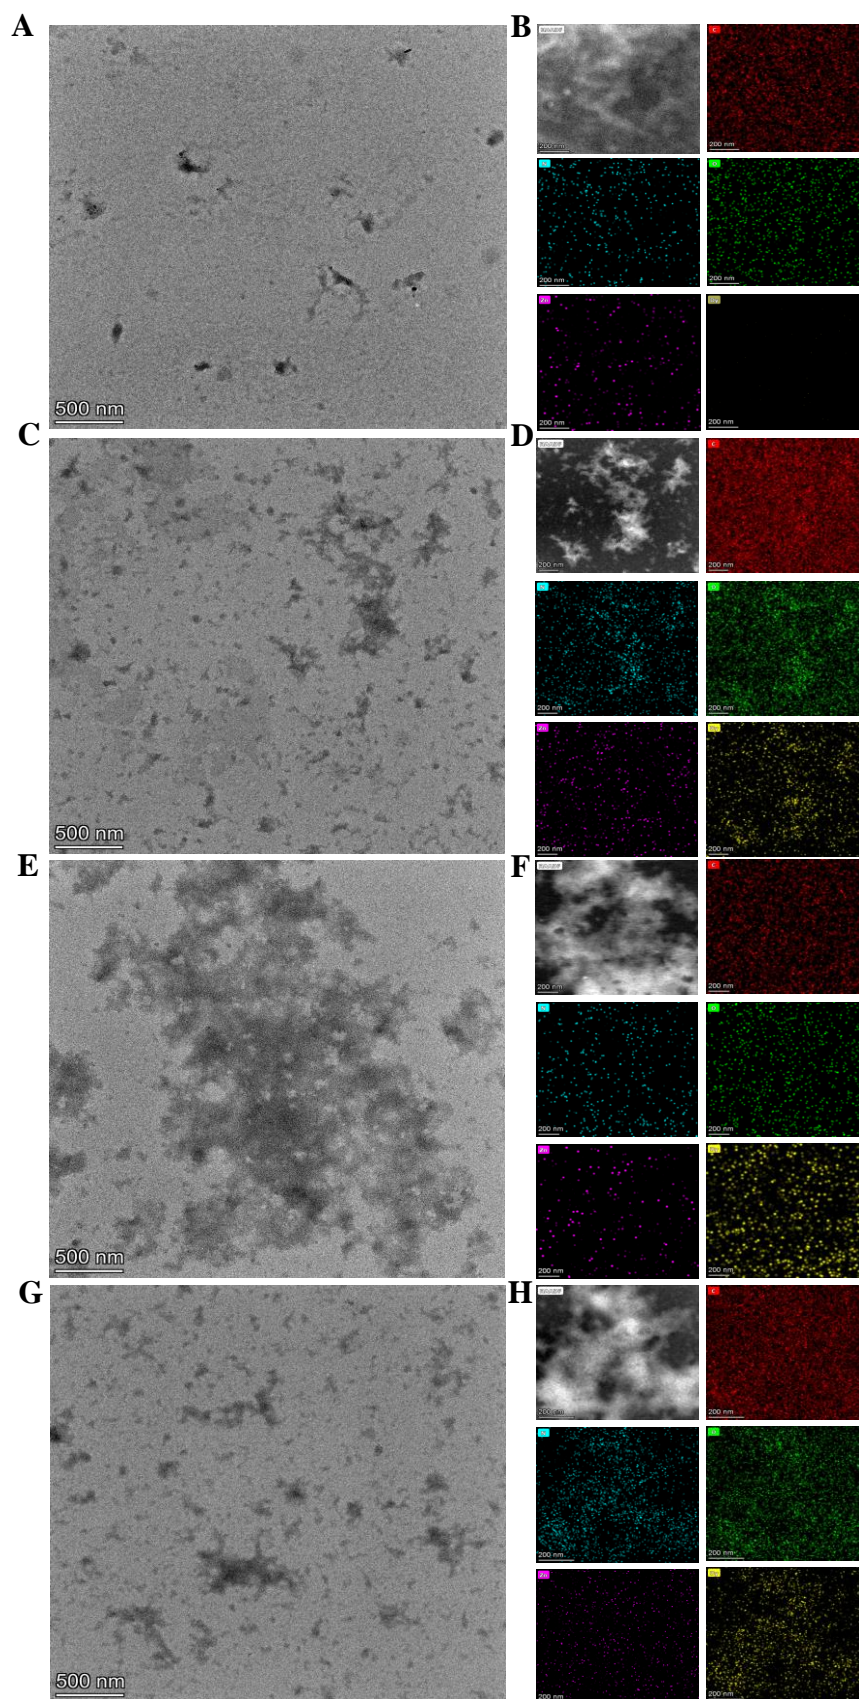

89  
90  
91  
92

**Figure S2** TEM images of Est solution (A), the reacted solution (Est, ASA, 2-MIm, and Dy (III)) (C), and adding SA (E) and AA (G), respectively. EDS analysis of Est solution (B), the above reacted solution (D), adding SA (F) and AA (H), respectively.

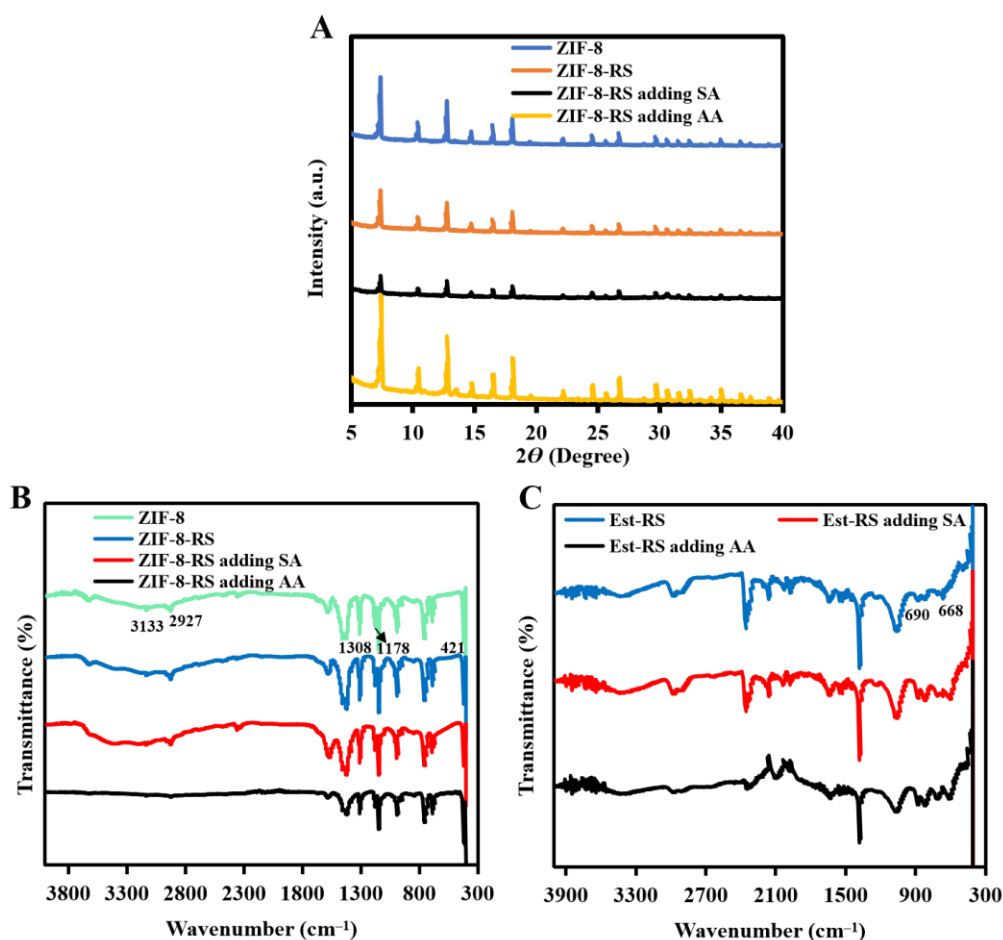

93

94 **Figure S3** XRD analysis of the original ZIF-8, and its reaction solution (ZIF-8 + ASA + 2-  
 95 MIm + Dy (III)) without and with adding SA and AA (A). FI-IR analysis of the original ZIF-  
 96 8, and its reaction solution (ZIF-8, ASA, 2-MIm, Dy (III)) without and with adding SA and  
 97 AA (B), the Est reaction solution (Est, ASA, 2-MIm, Dy (III)) without and with adding SA  
 98 and AA (C). “RS” means reaction system.

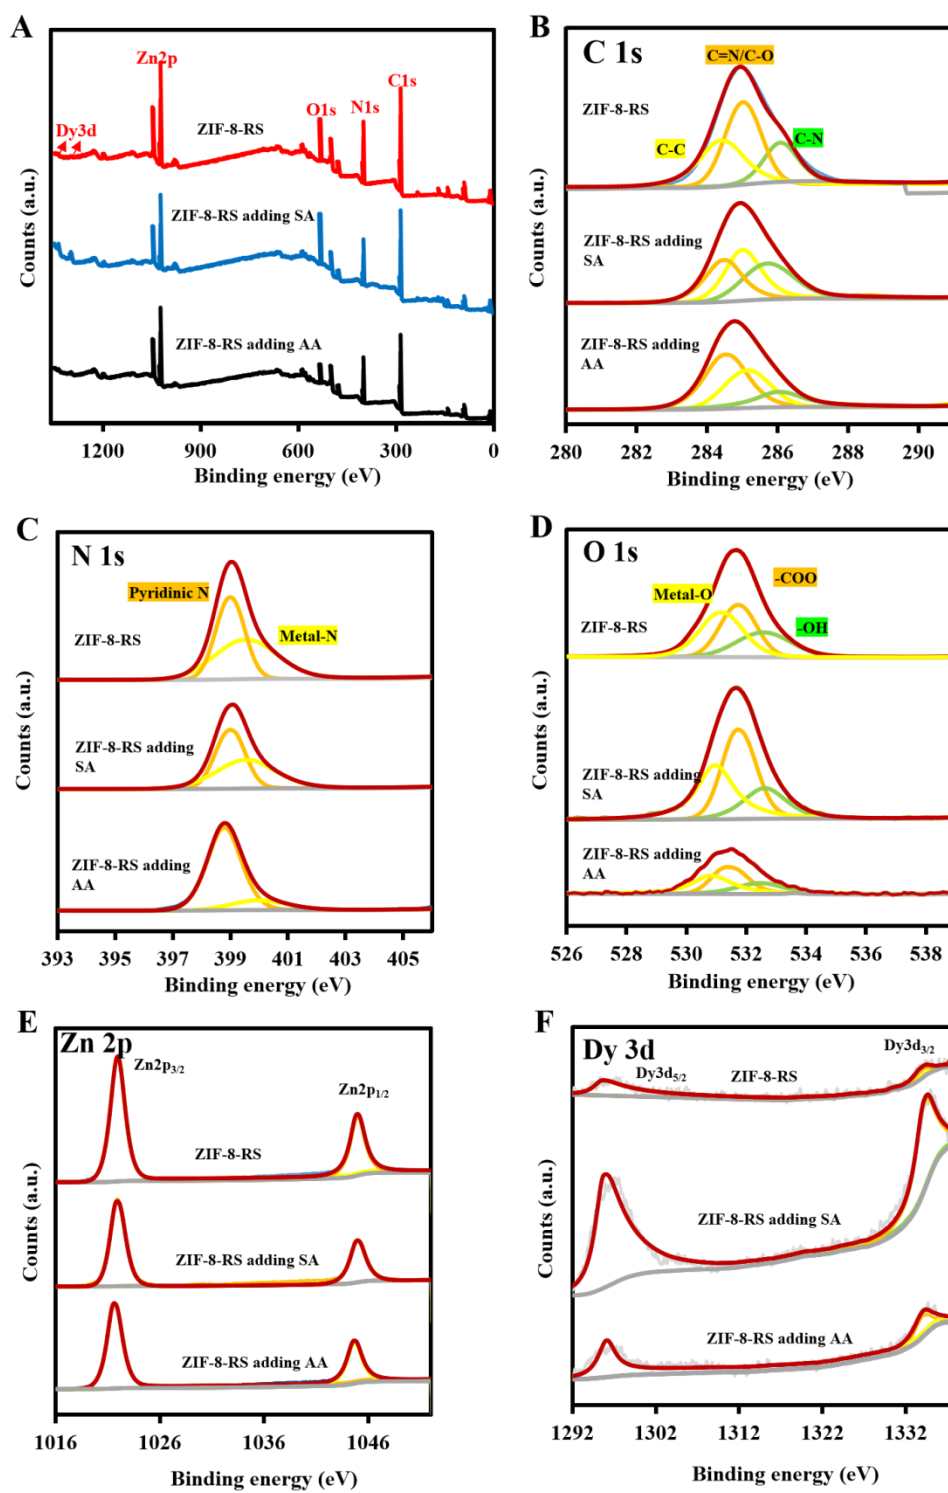

99

100 **Figure S4** XPS analysis of the ZIF-8 reacted system without and with adding SA and AA.  
 101 Survey scan (A), C 1s (B), N 1s (C), O 1s (D), Zn 2p (E), and Dy 3d (F). “RS” means reaction  
 102 system.

103



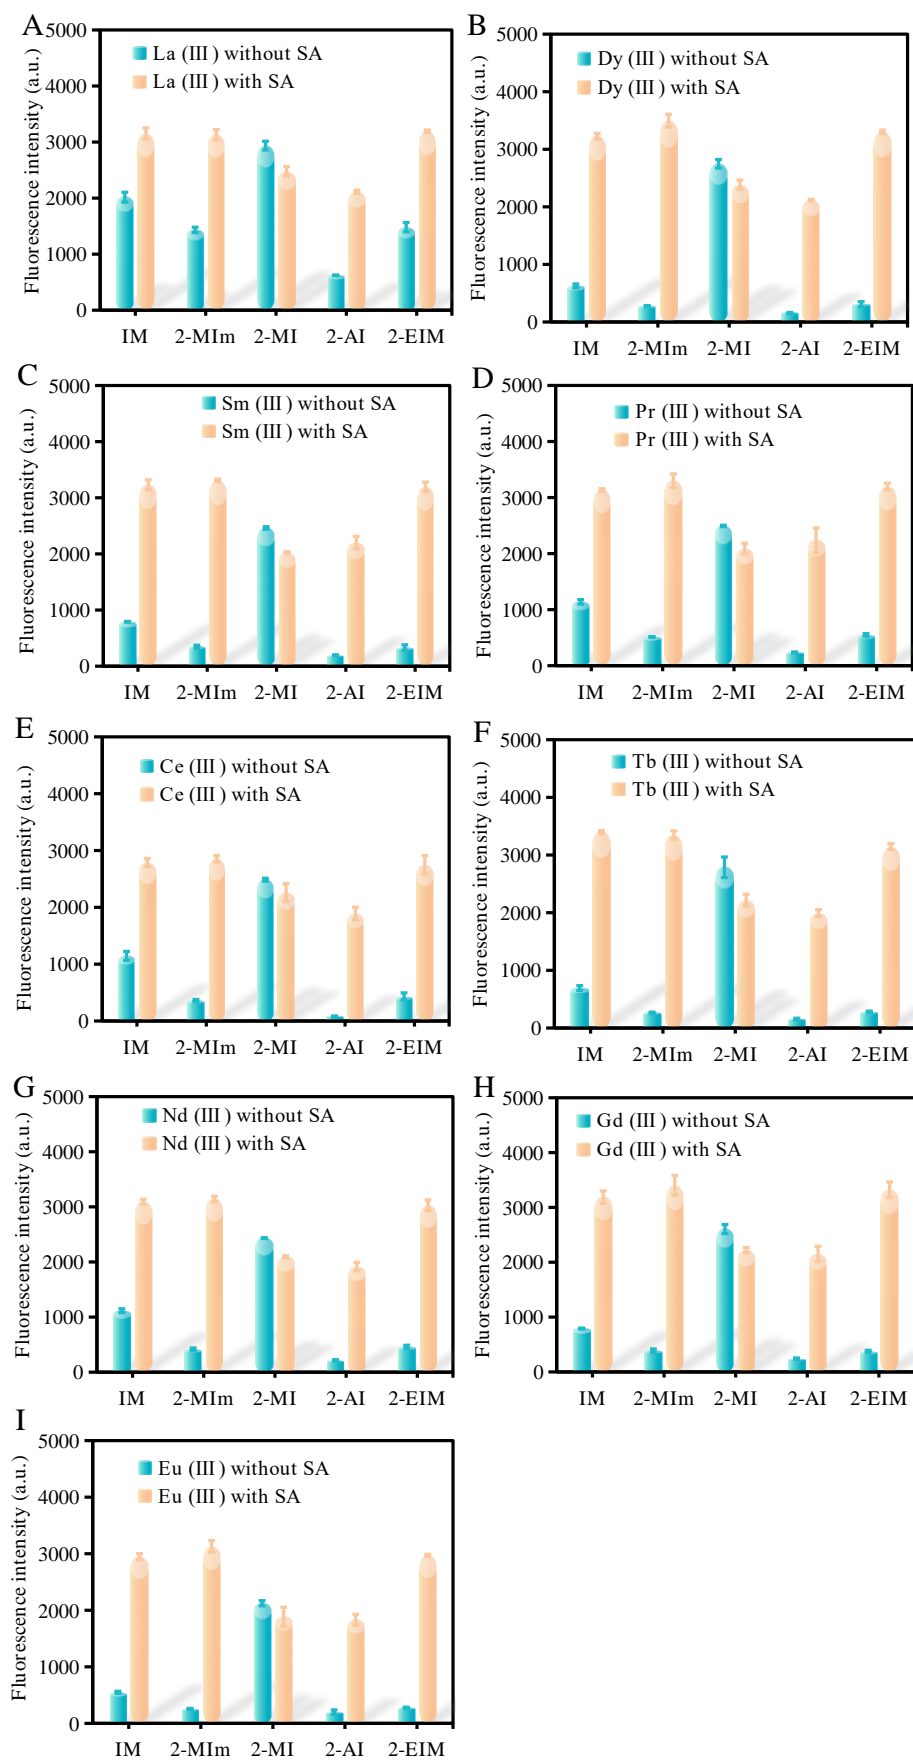

104

105

**Figure S5** Effects of different Ln (III) and imidazole ligands on Est-based reaction system.

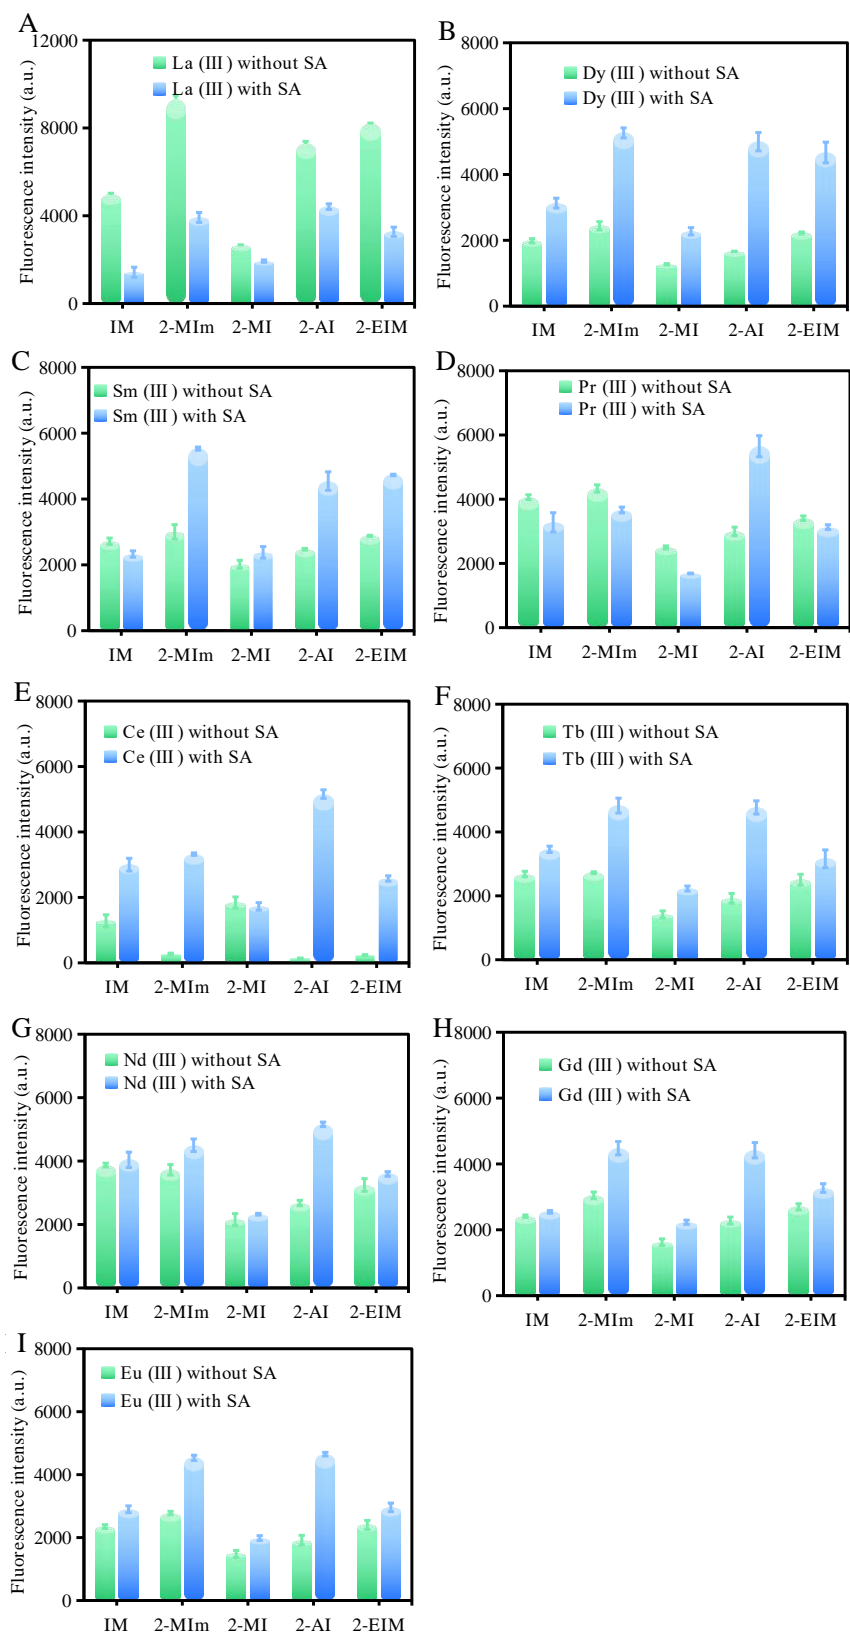

106

107

**Figure S6** Effects of different Ln (III) and imidazole ligands on ZIF-8-based reaction

108

systems.

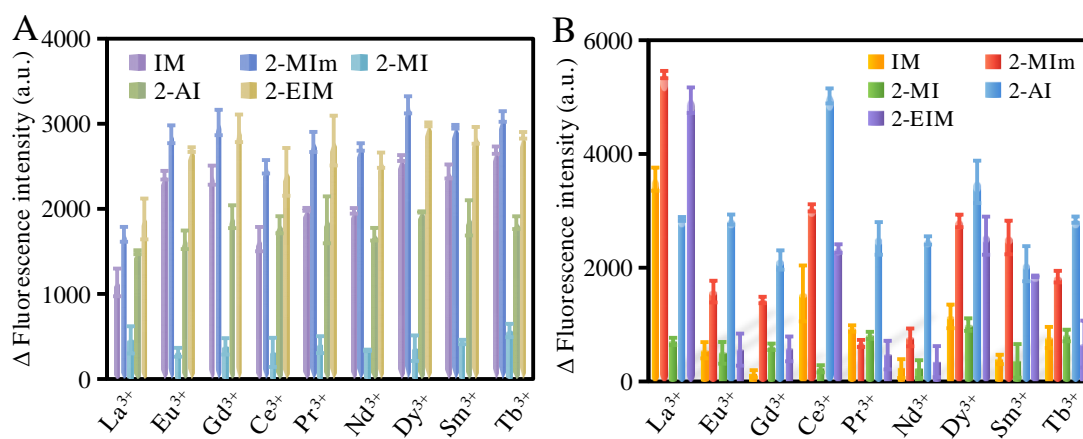

109

110 **Figure S7** The  $\Delta$  fluorescence intensity of different Ln (III) and ligands in Est (A) and ZIF-8

111

(B) reaction system.

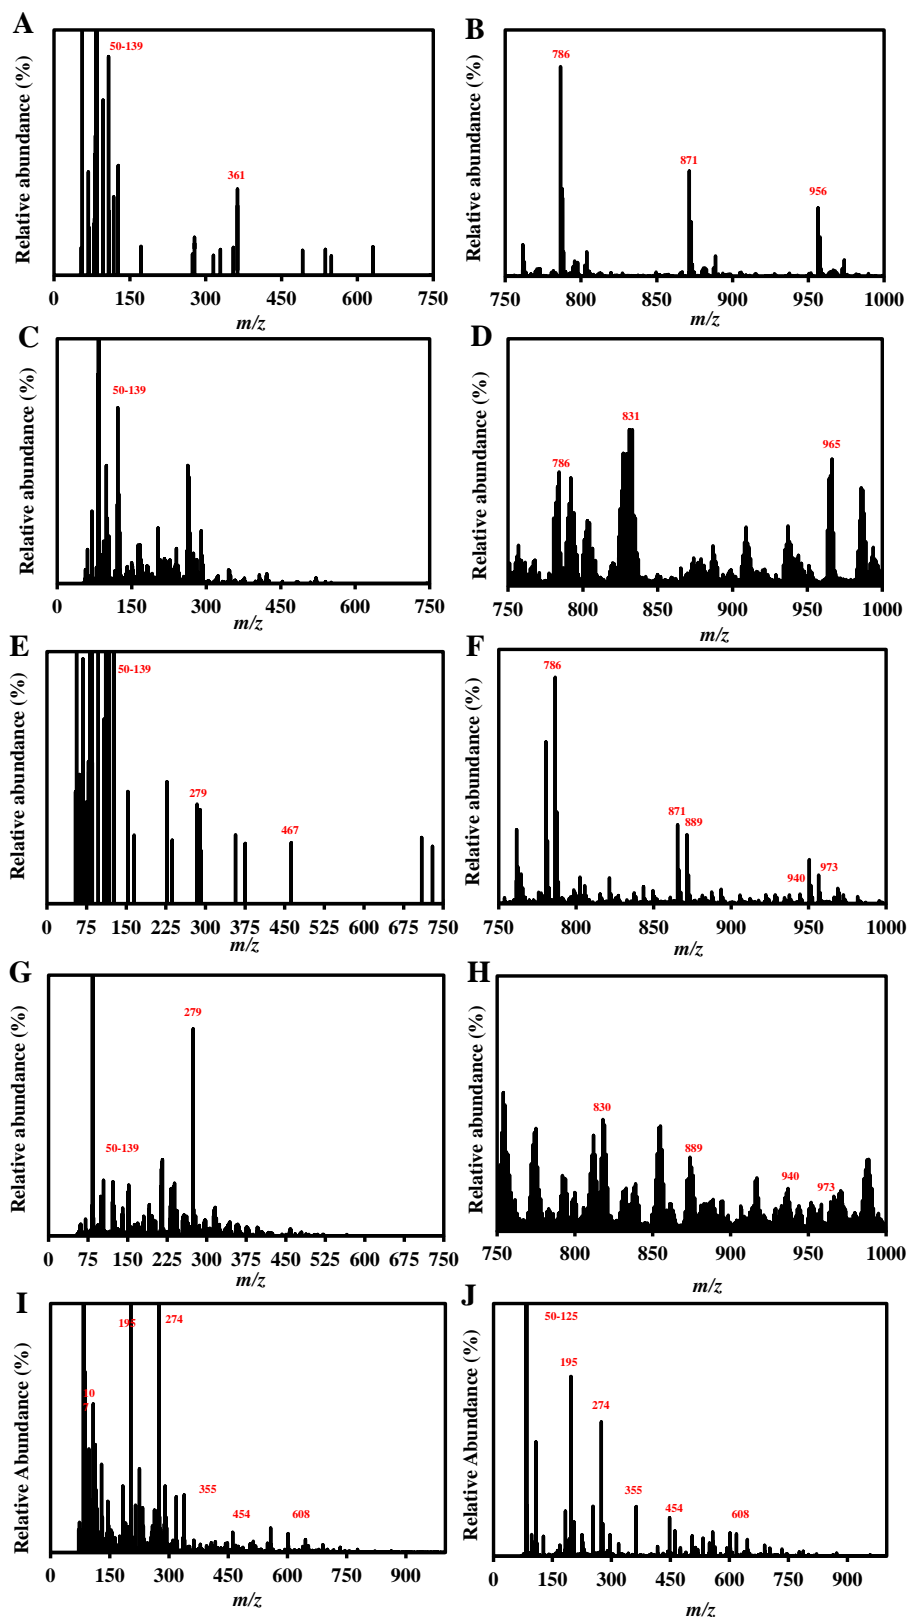

112

113 **Figure S8** Mass spectra of the reaction mixtures of Est + ASA + 2-MIm + Dy (III) (A, B),  
 114 ZIF-8 + ASA + 2-MIm + Dy (III) (C, D), Est + ASA + 2-MIm + Dy (III) + SA (E, F), ZIF-8  
 115 + ASA + 2-MIm + Dy (III) + SA (G, H), Est + ASA + 2-MIm + Dy (III) + AA (I), and ZIF-8  
 116 + ASA + 2-MIm + Dy (III) + AA (J), respectively.

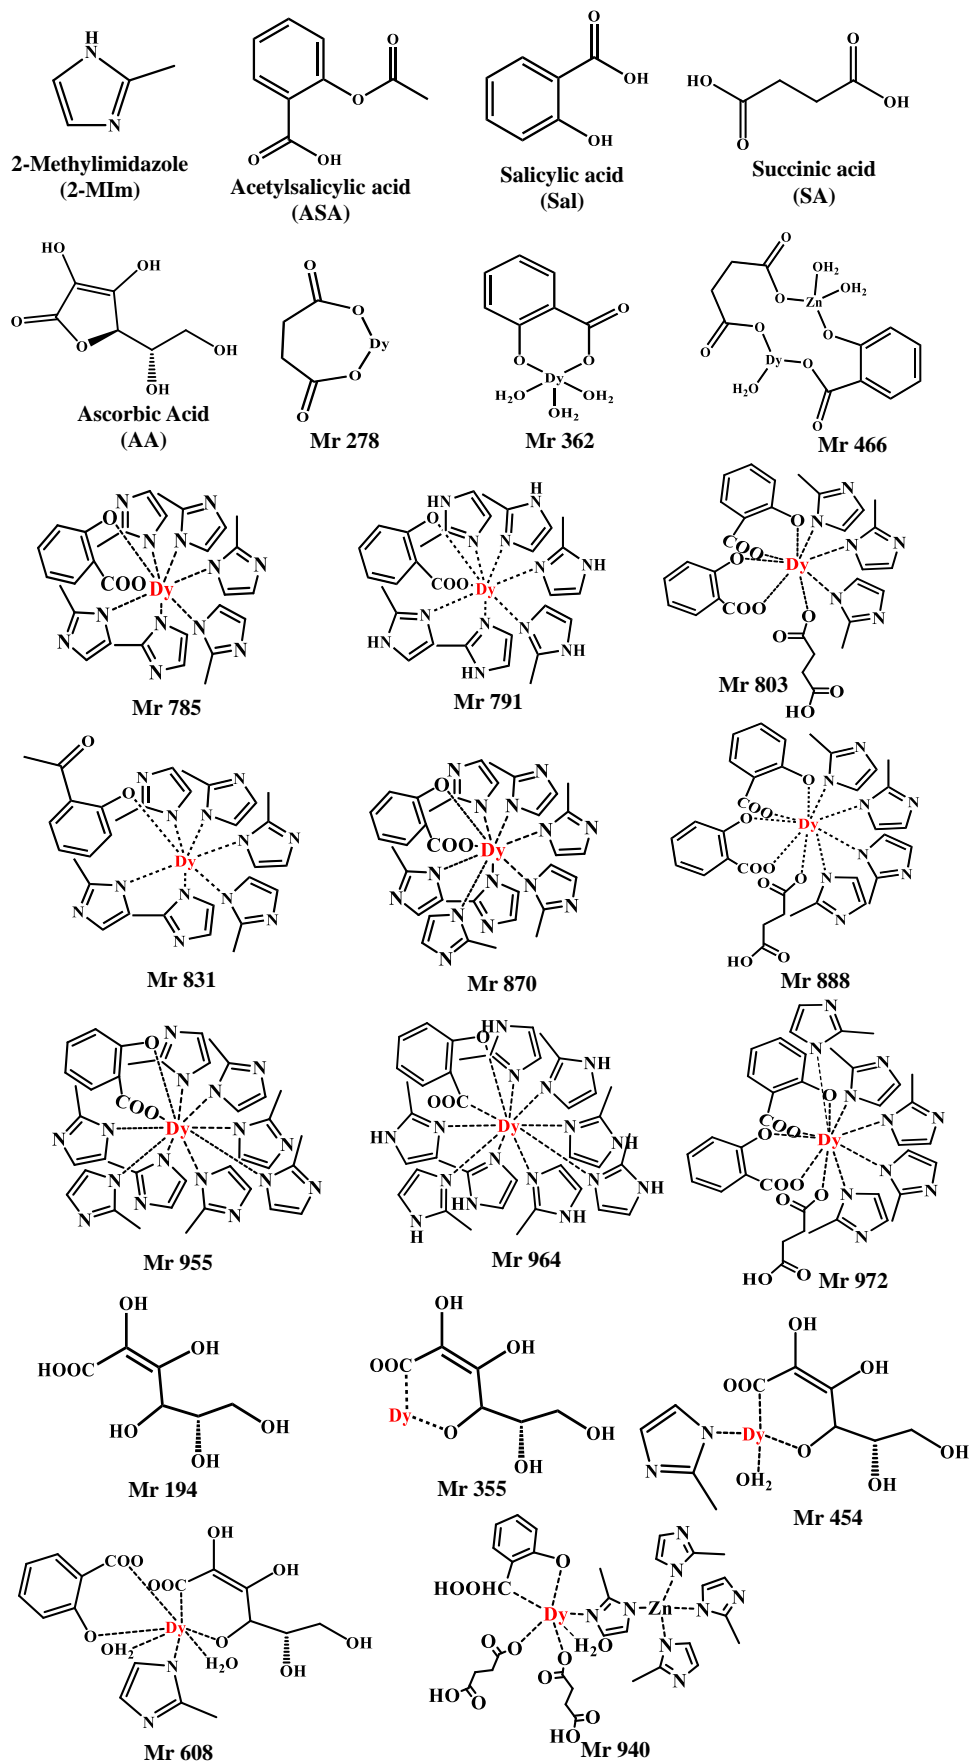

117

118

**Figure S9** The chemical structures of tentatively identified compounds.

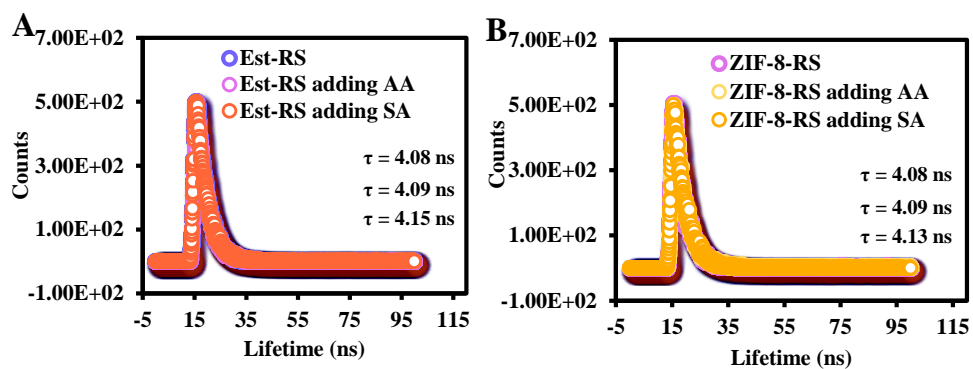

119

120

**Figure S10** Time-resolved fluorescence spectra of Est (A) and ZIF-8 (B)-based reaction systems without and with adding SA and AA. “RS” means reaction system.

121

122

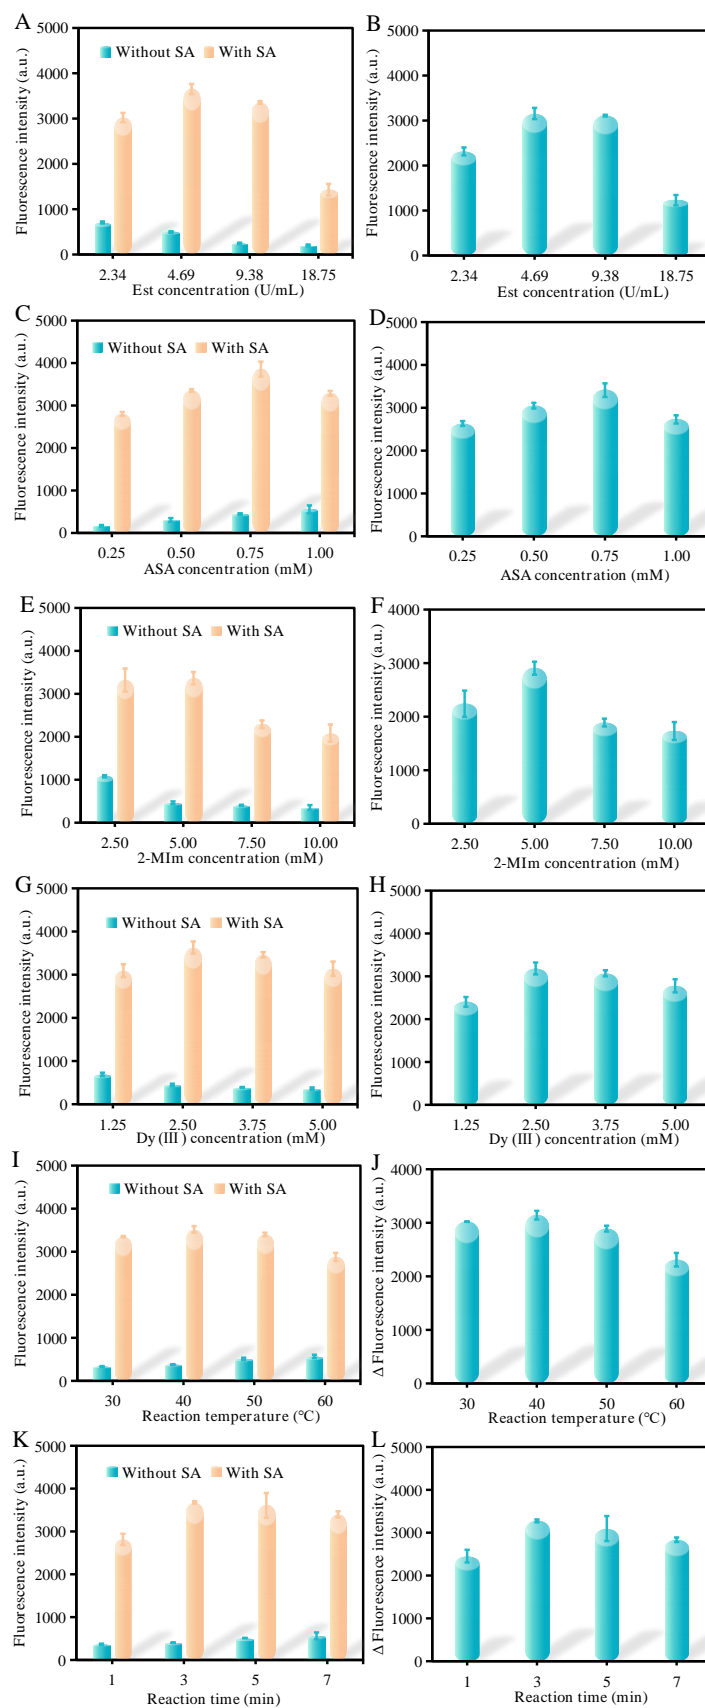

123

124 **Figure S11** Effects of Est (A, B), ASA (C, D), 2-MIm (E, F), Dy (III) (G, H) concentrations,

125

reaction temperature (I, J), and reaction time (K, L) on Est-based reaction system.

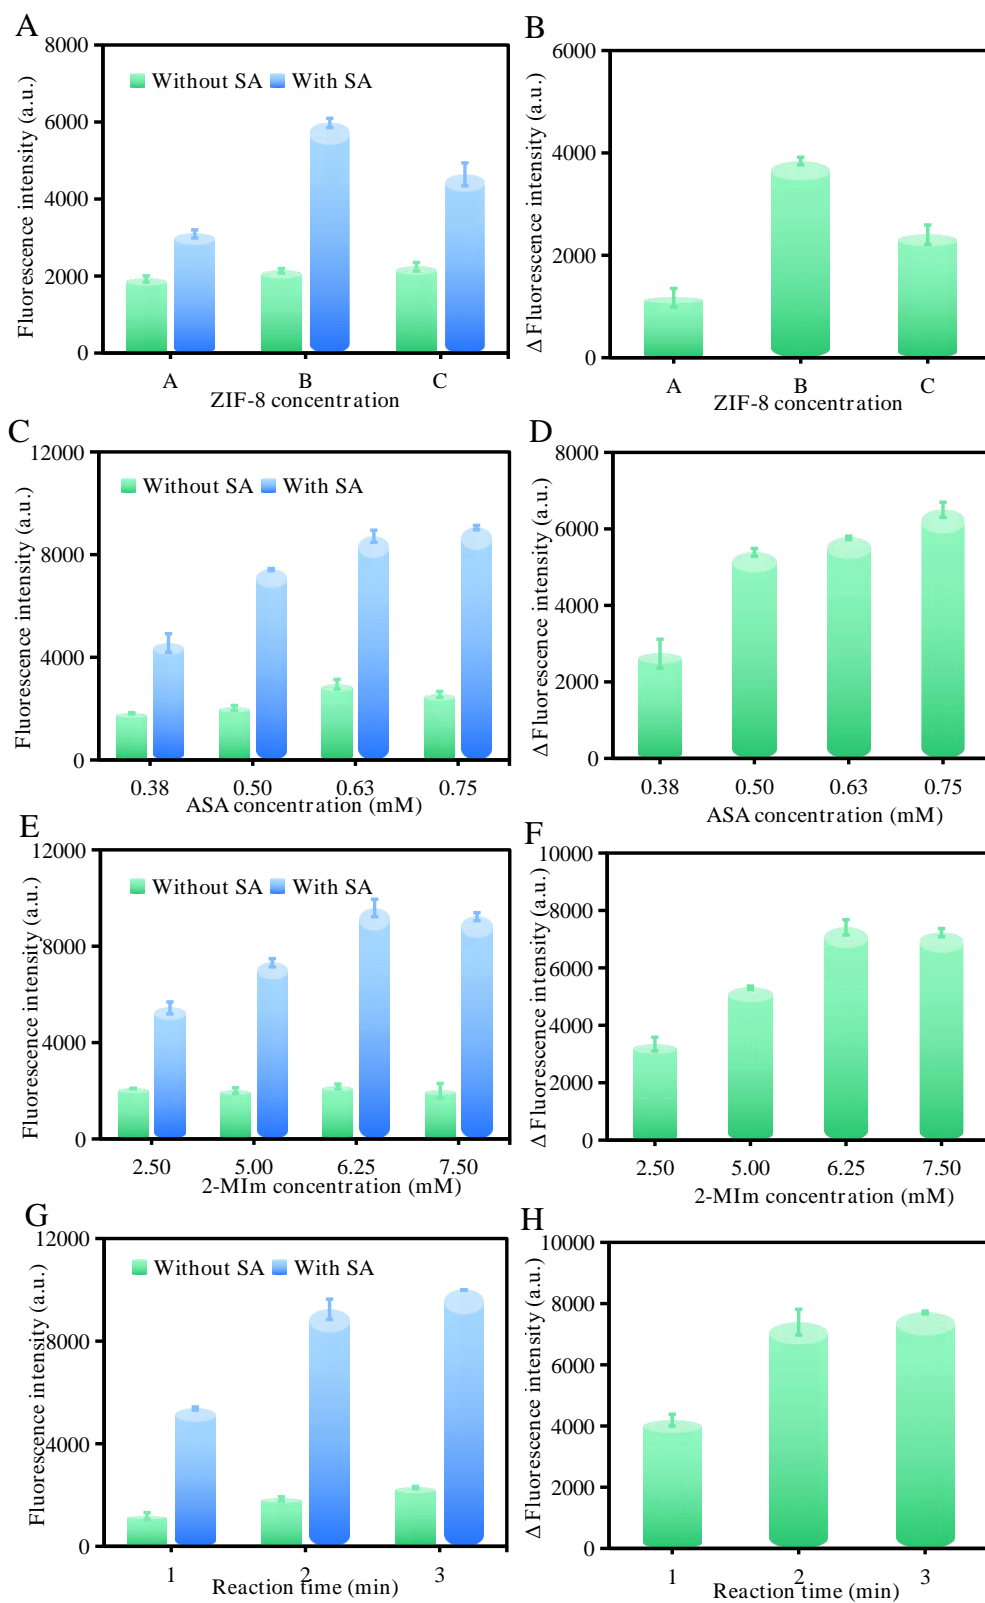

126

127

**Figure S12** Effects of ZIF-8 (A, B), ASA (C, D), 2-MIm (E, F), and reaction time (G, H)

128

concentrations on ZIF-8 reaction system.



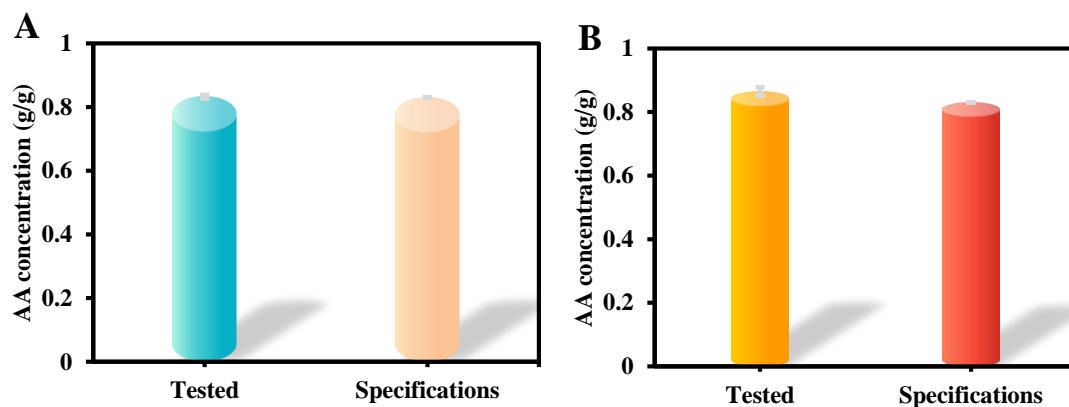

129

130

**Figure S13** Determination of AA in vitamin C tablet (the specifications are shown for comparison) by Est (**A**) and ZIF-8 (**B**) reaction systems.

131

132

133

134

**Table S1** Determination of ASA in Aspirin Enteric-Coated tablets.

|       | Specifications<br>(mM) | Tested<br>(mM) |
|-------|------------------------|----------------|
| ZIF-8 | 0.65                   | 0.59 ± 0.01    |
| Est   | 0.65                   | 0.64 ± 0.01    |

135

136

137

**Table S2** Determination of SA in rabbit plasma.

|       | Added<br>(mM) | Found<br>(mM) | Recovery<br>(%) | RSD<br>(%, $n = 3$ ) |
|-------|---------------|---------------|-----------------|----------------------|
| ZIF-8 | 0.16          | 0.14          | 87.5            | 2.3                  |
|       | 1.25          | 1.07          | 85.6            | 4.4                  |
|       | 2.50          | 2.42          | 96.8            | 3.3                  |
| Est   | 0.078         | 0.068         | 87.2            | 2.1                  |
|       | 0.75          | 0.63          | 84.0            | 1.6                  |
|       | 1.50          | 1.48          | 98.7            | 0.1                  |

138
